# Supplementary material
Source: Elsevier journal article supplement (https://www.sciencedirect.com/science/article/pii/S2603924920300793)
Supplement: mmc1 [file S2603924920300793:mmc1.docx]

**ANEXOS**

**Anexo 1 – cuestionario sobre la calidad de vida percibida (ccvp)**

1. VARIABLES SOCIODEMOGRÁFICAS

¿En qué año has nacido?........................................................................................

¿Cuál es el nivel de estudios de tu marido o pareja y el tuyo?

|  | De mi marido o pareja | El mío |
| --- | --- | --- |
| Inferior a Estudios Primarios |  |  |
| Estudios Primarios (Primaria) |  |  |
| Estudios Secundarios (E.S.O.) |  |  |
| Formación Profesional |  |  |
| Bachillerato |  |  |
| Estudios Universitarios (Diplomado, Licenciado, Máster…) |  |  |
| No sabe / No contesta |  |  |

¿Cuál es la situación laboral de tu marido o pareja y la tuya?

|  | De mi marido o pareja | La mía |
| --- | --- | --- |
| Labores del hogar |  |  |
| Trabajo |  |  |
| En paro |  |  |
| Jubilado / Pensionista |  |  |
| No sabe / No contesta |  |  |

1. HÁBITOS ALIMENTICIOS

¿Qué desayunas normalmente antes de salir de casa? (Puedes escoger más de una respuesta)

Leche

Café / Café con leche

Leche con Cola Cao / Nesquik

Zumo de frutas

Cereales con leche

Magdalenas / Galletas / Bollería industrial

Tostadas con mermelada y mantequilla

Pan con queso y/o embutido

NO desayuno

Otros:……………………………………………………………………………..

Durante una semana normal, ¿con qué frecuencia tomas las siguientes comidas? (Por favor, marca una vez por cada línea)

|  | Todos los días | 4-6 días por semana | 1-3 días por semana | Nunca o Casi nunca |
| --- | --- | --- | --- | --- |
| Desayuno con zumo, leche, cereales… |  |  |  |  |
| Comida caliente |  |  |  |  |
| Comida con sándwich o bocadillo |  |  |  |  |
| Merienda |  |  |  |  |
| Cena caliente |  |  |  |  |
| Cena con sándwich o bocadillo |  |  |  |  |

Durante una semana normal, ¿con qué frecuencia tomas los siguientes alimentos? (Por favor, marca una vez por cada línea)

|  | Todos los días | 4-6 días por semana | 1-3 días por semana | Nunca o Casi nunca |
| --- | --- | --- | --- | --- |
| Leche |  |  |  |  |
| Legumbres (garbanzos, lentejas…) |  |  |  |  |
| Refrescos u otras bebidas que contienen azúcar |  |  |  |  |
| Dulces y bollería (chocolate, caramelos…) |  |  |  |  |
| Verduras, hortalizas (zanahoria…) y frutas |  |  |  |  |
| Patatas |  |  |  |  |
| Frutos secos |  |  |  |  |
| Hamburguesas o salchichas |  |  |  |  |
| Arroz |  |  |  |  |
| Pasta: macarrones, fideos… |  |  |  |  |
| Carne (ternera, cerdo…) |  |  |  |  |
| Aves (pollo, pavo…) |  |  |  |  |
| Pescado |  |  |  |  |
| Huevos |  |  |  |  |
| Embutido |  |  |  |  |
| Pan blanco |  |  |  |  |
| Productos integrales (pan, cereales…) |  |  |  |  |
| Derivados lácteos (yogurt, queso…) |  |  |  |  |

En este momento, ¿estás siguiendo alguna dieta o haciendo alguna otra cosa para perder peso?

No, considero que mi peso es correcto.

No, pero debería perder algo de peso.

No, porque necesito ganar peso.

Sí.

En caso de que estés siguiendo una dieta, ¿quién te la proporcionó? (Puedes escoger más de una respuesta)

Un médico o dietista.

Un amigo.

Un familiar.

La leí en un revista / internet.

1. ACTIVIDAD Y EJERCICIO FÍSICO

Durante una semana normal, ¿cuántas veces participas en deportes o realizas actividades físicas?

Nunca.

Menos de 1 vez a la semana.

1 vez por semana.

2-3 veces por semana.

4-5 veces por semana.

6-7 veces por semana.

En caso de que realices deportes o actividad física, ¿cuál es la duración de cada sesión?

Menos de 5 minutos.

6-15 minutos.

16-25 minutos.

26-35 minutos.

36-45 minutos.

Más de 45 minutos.

¿En qué deportes y/o actividad física participas? (Puedes señalar más de una casilla)

Caminar.

Correr.

Fútbol.

Baloncesto.

Montar en bicicleta.

Aeróbic.

Patinaje.

Natación.

Artes marciales (judo, kárate…).

Deportes de raqueta (tenis, bádminton, pádel, pin-pon…).

Esquí.

Atletismo.

1. SUEÑO Y DESCANSO

¿A qué hora te levantas normalmente entre semana?

Antes de las 7 h. de la mañana.

De 7 a 7:30 h. de la mañana.

De 7:30 a 8 h. de la mañana.

De 8 a 8:30 h. de la mañana.

De 8:30 a 9 h. de la mañana.

Más tarde de las 9 h. de la mañana.

¿A qué hora te acuestas normalmente entre semana?

Antes de las 11 h. de la noche.

De 11 a 11:30 h. de la noche.

De 11:30 a 12 h. de la noche.

Más tarde de las 12 h. de la noche.

Responde a las siguientes preguntas: (Por favor, marca una vez por cada línea.)

|  | Sí | No | A veces |
| --- | --- | --- | --- |
| Por las mañanas, ¿te despiertas cansada y seguirías durmiendo? |  |  |  |
| ¿Duermes de un tirón toda la noche? |  |  |  |
| ¿Te cuesta conciliar el sueño? |  |  |  |
| ¿Te encuentras con frecuencia agobiada y en tensión? |  |  |  |
| ¿Te encuentras nerviosa y “a punto de explotar”? |  |  |  |
